# Supplementary material
Source: Springer Nature journal article supplement (https://www.springermedizin.de/resource/supplementary/12943_2014_1320_MOESM14_ESM.pdf/9552714)

A)

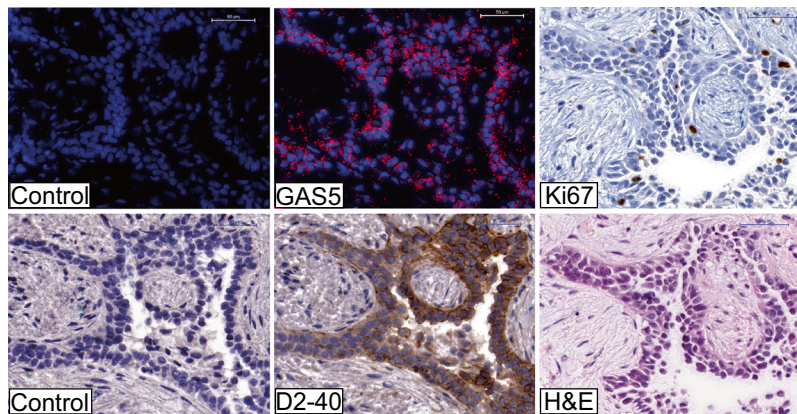

C)

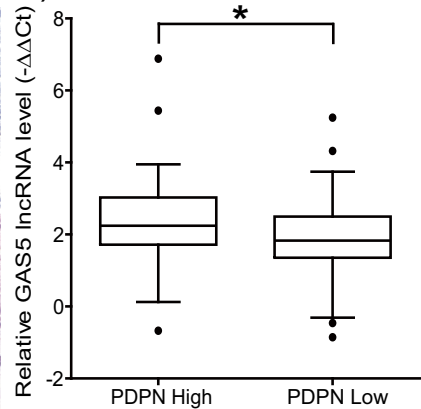

B) Epithelioid

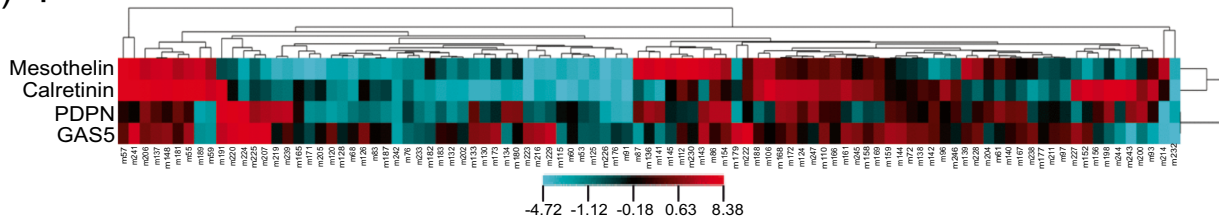

Biphasic

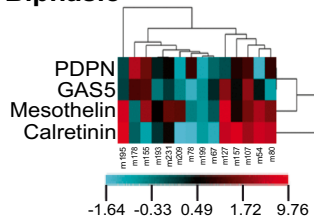

Sarcomatoid

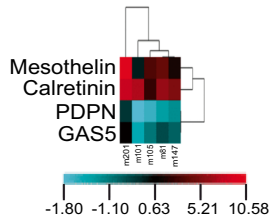

Supplement: MOESM14 [file 9552714]
